# Supplementary material
Source: PubMed Central journal article supplement (PMC4018836)
Supplement: NIHMS577449-supplement-01.pdf [file NIHMS577449-supplement-01.pdf]

Table S1. List of metabolic pathways in the expanded compound-reaction-enzyme-gene (CREG) fatty acid network.

---

Arachidonic acid metabolism

*De novo* fatty acid biosynthesis

Di-unsaturated fatty acid beta-oxidation

Glycosphingolipid metabolism

Leukotriene metabolism

Linoleate metabolism

Mono-unsaturated fatty acid beta-oxidation

Omega-6 fatty acid metabolism

Prostaglandin formation from arachidonate

Prostaglandin formation from dihomo gamma-linoleic acid

Putative anti-Inflammatory metabolites formation from EPA

Saturated fatty acids beta-oxidation

---
